# Supplementary material
Source: Springer Nature journal article supplement (https://www.springermedizin.de/resource/supplementary/12943_2010_799_MOESM3_ESM.pdf/9554860)

A IP: ErbB2

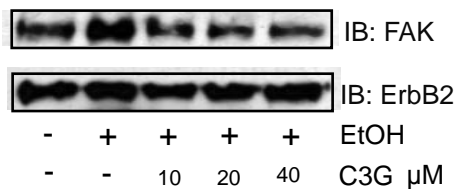

B IP: p130<sup>Cas</sup>

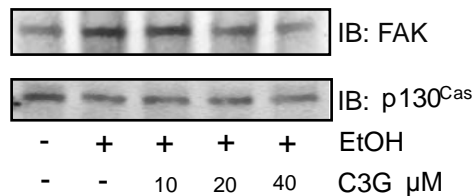

C

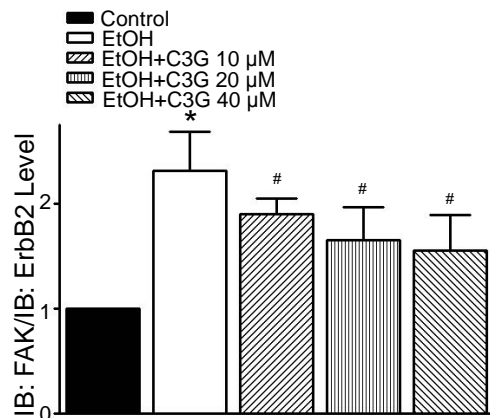

D

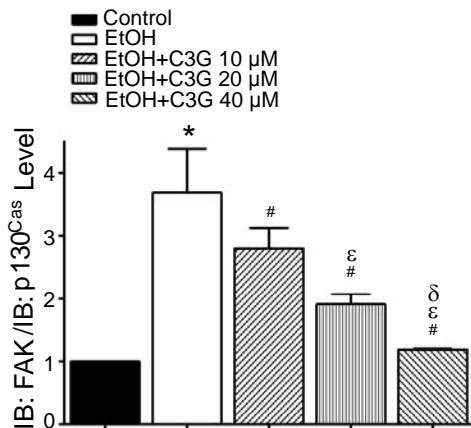

E IP: cSrc

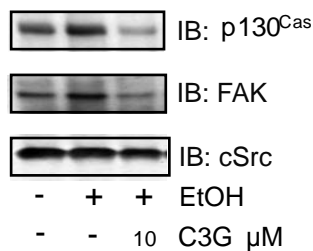

Supplement: MOESM3 [file 9554860]
